# Supplementary material for: Applications of bioluminescence in biotechnology and beyond
Source: Royal Society of Chemistry journal article supplement (doi:10.1039/d0cs01492c), 2021-01-01
Supplement: d0cs01492c1.pdf [file d0cs01492c1.pdf]

*Table S1 – Commercially available instruments and packages for ATP sensing*

| Supplier                   | Assay format           | Measurement taken                                                                                                                                        | Limit of detection                                                        | Mode of detection                                                                                                                           |
|----------------------------|------------------------|----------------------------------------------------------------------------------------------------------------------------------------------------------|---------------------------------------------------------------------------|---------------------------------------------------------------------------------------------------------------------------------------------|
| 3M™                        | Surface swabs/portable | Total ATP levels measured                                                                                                                                | 10 <sup>-15</sup> M of ATP                                                | 3M™ Clean-Trace™ NG Luminometer – a hand-held and portable device                                                                           |
|                            | 96 well plate          | Microbial ATP in Ultra-high temperature (UHT) packaged milk                                                                                              | 10 <sup>-18</sup> M of ATP                                                | 3M™ Microbial Luminescence System (MLS II) – consists of a built-in photomultiplier tube and injector.                                      |
| Hygiena™                   | Surface swabs/portable | Both total ATP levels and microbial ATP levels can be detected depending on the swab used                                                                | 10 <sup>-16</sup> M of ATP                                                | Hygiena™ EnSURE™ Touch – smart, hand-held, portable instrument with access to WiFi and Cloud storage                                        |
| Neogen™                    | Surface swabs          | Total ATP levels measured from surfaces and rinse water – different swabs available for each application                                                 | 10 <sup>-14</sup> M of ATP                                                | Neogen™ AccuPoint™ Advanced Reader - a hand-held and portable device used with Neogen™ AccuPoint™ Advanced Samplers                         |
| Charm Sciences Inc         | Swabs                  | Total ATP levels measured –different swabs available depending on the sample type, <i>ie</i> water sample, surface sample, field sample and food sample. | 10 <sup>-15</sup> M of ATP                                                | novaLUM II-X System – a hand-held and portable device used with the appropriate swab to detect ATP from microbial and organic contamination |
|                            | 96 well plate          | Microbial ATP in UHT food samples including milk, broth, ice-creams and nutritional drinks.                                                              | Data could not be found*                                                  | EPIC Microbial ATP system - consists of a built-in photomultiplier tube and injector.                                                       |
| Charles River Laboratories | Cuvette                | Microbial ATP                                                                                                                                            | Data could not be found*                                                  | Celsis Advance II™ luminometer, combined with Celsis® ATP-bioluminescence reagents                                                          |
| Promega                    | 96 well plate          | Microbial ATP using the BacTiter-Glo™ Microbial Cell Viability Assay                                                                                     | 10 <sup>-15</sup> M of ATP (corresponds to 10 cells of <i>B. cereus</i> ) | GloMax® 96 Microplate Luminometer consists of dual injectors and a charge-coupled device camera to record luminescence.                     |

|                        |                                                                          |                                                                                                    |                                                                                          |                                                                                                                                                                                        |
|------------------------|--------------------------------------------------------------------------|----------------------------------------------------------------------------------------------------|------------------------------------------------------------------------------------------|----------------------------------------------------------------------------------------------------------------------------------------------------------------------------------------|
|                        |                                                                          |                                                                                                    |                                                                                          |                                                                                                                                                                                        |
| Roche™                 | Cuvette or 96 well plate                                                 | The kit contains a separate cell-lysis reagent to help determine cellular microbial/ATP if needed. | $10^{-5}$ to $10^{-12}$ M ATP                                                            | Is sold as an independent kit without a luminometer. Suitable for use in tube luminometers and microplate-format luminometers.                                                         |
| Pall corporation       | Swabs for surfaces and cuvette for liquid samples                        | The protocol involves cell lysis and determines cellular microbial/ATP.                            | 10 – 100 CFU (colony forming units) – different bacteria contain varying amounts of ATP. | Pallchek™ Rapid Microbiology System comes with accessories consisting of swabs, reagents and positive controls.                                                                        |
| Merck/<br>SigmaAldrich | Sampling pens can be used for swabbing as well as holding liquid samples | Detects total ATP content from both microbes as well as organic matter/food soiling.               | Data could not be found*                                                                 | HY-LITE® 2 ATP Rapid Detection System – sampling accessories available in the form of sample pens. A portable device that can save up to 1000 readings and print off readings as well. |

- Data could not be found online at the time of writing – 26/01/2021
